# Supplementary material for: Restriction of V3 region sequence divergence in the HIV-1 envelope gene during antiretroviral treatment in a cohort of recent seroconverters
Source: PubMed Central journal article supplement (PMC3605130; doi:10.1186/1742-4690-10-8), 2013-01-18
Supplement: 1742-4690-10-8-S1.pdf [file 1742-4690-10-8-S1.pdf]

**Table S1 Read numbers in data analysis steps**

| Sample                                               | Initial no. of reads | Included in assembly <sup>a</sup> |                  | Comprising complete V3 <sup>b</sup> |                  | Final alignment <sup>c</sup> |                  | Unique sequences |                      |
|------------------------------------------------------|----------------------|-----------------------------------|------------------|-------------------------------------|------------------|------------------------------|------------------|------------------|----------------------|
|                                                      |                      | No.                               | % of total reads | No.                                 | % of total reads | No.                          | % of total reads | No.              | % of final alignment |
| <b>Subject (time) - samples at primary infection</b> |                      |                                   |                  |                                     |                  |                              |                  |                  |                      |
| #1 (day 0)                                           | 1629                 | 1531                              | 93.98            | 1197                                | 73.48            | 1093                         | 67.10            | 114              | 10.43                |
| #2 (day 0)                                           | 13214                | 10900                             | 82.49            | 8505                                | 64.36            | 8351                         | 63.20            | 902              | 10.80                |
| #3 (day 0)                                           | 9361                 | 7583                              | 81.01            | 6130                                | 65.48            | 6098                         | 65.14            | 338              | 5.54                 |
| #4 (day 0)                                           | 12109                | 8818                              | 72.82            | 7054                                | 58.25            | 6891                         | 56.91            | 385              | 5.59                 |
| #5 (day 0)                                           | 7621                 | 6463                              | 84.81            | 4925                                | 64.62            | 4894                         | 64.22            | 255              | 5.21                 |
| #6 (day 0)                                           | 8564                 | 5878                              | 68.64            | 4598                                | 53.69            | 4545                         | 53.07            | 410              | 9.02                 |
| #7 (day 0)                                           | 8327                 | 6609                              | 79.37            | 5615                                | 67.43            | 5540                         | 66.53            | 301              | 5.43                 |
| #8 (day 0)                                           | 1015                 | 970                               | 95.57            | 806                                 | 79.41            | 793                          | 78.13            | 56               | 7.06                 |
| #9 (day 0)                                           | 1410                 | 1283                              | 90.99            | 1187                                | 84.18            | 1185                         | 84.04            | 100              | 8.44                 |
| #10 (day 0)                                          | 2705                 | 2573                              | 95.12            | 2365                                | 87.43            | 2355                         | 87.06            | 83               | 3.52                 |
| #11 (day 0)                                          | 3772                 | 3358                              | 89.02            | 2979                                | 78.98            | 2967                         | 78.66            | 154              | 5.19                 |
| #12 (day 0)                                          | 3932                 | 2783                              | 70.78            | 1306                                | 33.21            | 1279                         | 32.53            | 95               | 7.43                 |
| #13 (day 0)                                          | 2293                 | 2227                              | 97.12            | 2008                                | 87.57            | 2001                         | 87.27            | 119              | 5.95                 |
| #14 (day 0)                                          | 1996                 | 1801                              | 90.23            | 1410                                | 70.64            | 1370                         | 68.64            | 171              | 12.48                |
| #15 (day 0)                                          | 508                  | 462                               | 90.94            | 405                                 | 79.72            | 403                          | 79.33            | 23               | 5.71                 |
| #16 (day 0)                                          | 9822                 | 7936                              | 80.80            | 5542                                | 56.42            | 5175                         | 52.69            | 299              | 5.78                 |
| #17 (day 0)                                          | 37555                | 24341                             | 64.81            | 16709                               | 44.49            | 16394                        | 43.65            | 712              | 4.34                 |
| #18 (day 0)                                          | 12650                | 11362                             | 89.82            | 8381                                | 66.25            | 8026                         | 63.45            | 652              | 8.12                 |
| #19 (day 0)                                          | 17282                | 6492                              | 37.57            | 3928                                | 22.73            | 3845                         | 22.25            | 440              | 11.44                |
| #20 (day 0)                                          | 24562                | 11566                             | 47.09            | 8558                                | 34.84            | 8498                         | 34.60            | 395              | 4.65                 |
| #21 (day 0)                                          | 28233                | 11136                             | 39.44            | 6975                                | 24.71            | 6865                         | 24.32            | 309              | 4.50                 |
| #22 (day 0)                                          | 2592                 | 2319                              | 89.47            | 1267                                | 48.88            | 1211                         | 46.72            | 128              | 10.57                |
| #23 (day 0)                                          | 2351                 | 1597                              | 67.93            | 1094                                | 46.53            | 1077                         | 45.81            | 165              | 15.32                |

|                                            |       |       |       |       |       |       |       |     |       |
|--------------------------------------------|-------|-------|-------|-------|-------|-------|-------|-----|-------|
| <b>#24 (day 0)</b>                         | 2654  | 1609  | 60.63 | 1425  | 53.69 | 1411  | 53.17 | 159 | 11.27 |
| <b>#25 (day 0)</b>                         | 12069 | 11259 | 93.29 | 6504  | 53.89 | 6369  | 52.77 | 796 | 12.50 |
| <b>#26 (day 0)</b>                         | 2196  | 1987  | 90.48 | 1395  | 63.52 | 1328  | 60.47 | 116 | 8.73  |
| <b>#27 (day 0)</b>                         | 4869  | 4439  | 91.17 | 2412  | 49.54 | 2354  | 48.35 | 157 | 6.67  |
| <b>#28 (day 0)</b>                         | 3600  | 3145  | 87.36 | 2148  | 59.67 | 2073  | 57.58 | 161 | 7.77  |
| <b>#29 (day 0)</b>                         | 1905  | 1573  | 82.57 | 1116  | 58.58 | 1108  | 58.16 | 152 | 13.72 |
| <b>#30 (day 0)</b>                         | 1959  | 1910  | 97.50 | 1215  | 62.02 | 1214  | 61.97 | 51  | 4.20  |
| <b>Subject (time) - samples at week 60</b> |       |       |       |       |       |       |       |     |       |
| <b>#1 (day 436)</b>                        | 3776  | 3715  | 98.38 | 3322  | 87.98 | 3275  | 86.73 | 83  | 2.53  |
| <b>#2 (day 437)</b>                        | 5453  | 5263  | 96.52 | 4023  | 73.78 | 4015  | 73.63 | 437 | 10.88 |
| <b>#3 (day 441)</b>                        | 1963  | 1825  | 92.97 | 1425  | 72.59 | 1424  | 72.54 | 100 | 7.02  |
| <b>#4 (day 435)</b>                        | 2440  | 2335  | 95.70 | 2060  | 84.43 | 2058  | 84.34 | 94  | 4.57  |
| <b>#5 (day 438)</b>                        | 2689  | 2553  | 94.94 | 2062  | 76.68 | 2055  | 76.42 | 105 | 5.11  |
| <b>#6 (day 422)</b>                        | 1882  | 1732  | 92.03 | 1600  | 85.02 | 1597  | 84.86 | 99  | 6.20  |
| <b>#7 (day 450)</b>                        | 4243  | 4065  | 95.80 | 3653  | 86.09 | 3639  | 85.76 | 253 | 6.95  |
| <b>#8 (day 445)</b>                        | 16818 | 11818 | 70.27 | 9480  | 56.37 | 9270  | 55.12 | 733 | 7.91  |
| <b>#9 (day 419)</b>                        | 19742 | 17558 | 88.94 | 14841 | 75.17 | 14810 | 75.02 | 300 | 2.03  |
| <b>#10 (day 429)</b>                       | 5239  | 4839  | 92.36 | 4289  | 81.87 | 4284  | 81.77 | 126 | 2.94  |
| <b>#11 (day 434)</b>                       | 10447 | 7169  | 68.62 | 6762  | 64.73 | 6582  | 63.00 | 309 | 4.69  |
| <b>#12 (day 449)</b>                       | 15818 | 13614 | 86.07 | 11599 | 73.33 | 11545 | 72.99 | 306 | 2.65  |
| <b>#13 (day 420)</b>                       | 3460  | 3217  | 92.98 | 2508  | 72.49 | 2446  | 70.69 | 266 | 10.87 |
| <b>#14 (day 413)</b>                       | 12525 | 11607 | 92.67 | 9019  | 72.01 | 8698  | 69.45 | 662 | 7.61  |
| <b>#15 (day 431)</b>                       | 1628  | 1323  | 81.27 | 1073  | 65.91 | 1037  | 63.70 | 59  | 5.69  |
| <b>#16 (day 433)</b>                       | 2473  | 2316  | 93.65 | 1748  | 70.68 | 1618  | 65.43 | 226 | 13.97 |
| <b>#17 (day 420)</b>                       | 6864  | 6120  | 89.16 | 5156  | 75.12 | 5000  | 72.84 | 658 | 13.16 |
| <b>#18 (day 392)</b>                       | 1268  | 1211  | 95.50 | 925   | 72.95 | 882   | 69.56 | 161 | 18.25 |
| <b>#19 (day 415)</b>                       | 3030  | 2391  | 78.91 | 1793  | 59.17 | 1776  | 58.61 | 181 | 10.19 |

|                                                                              |       |       |       |       |       |       |       |      |       |
|------------------------------------------------------------------------------|-------|-------|-------|-------|-------|-------|-------|------|-------|
| <b>#20 (day 468)</b>                                                         | 15952 | 11282 | 70.72 | 8934  | 56.01 | 8872  | 55.62 | 410  | 4.62  |
| <b>#21 (day 443)</b>                                                         | 30536 | 23431 | 76.73 | 17316 | 56.71 | 16753 | 54.86 | 795  | 4.75  |
| <b>#22 (day 442)</b>                                                         | 3646  | 2995  | 82.14 | 2159  | 59.22 | 2013  | 55.21 | 211  | 10.48 |
| <b>#23 (day 387)</b>                                                         | 22652 | 20761 | 91.65 | 16169 | 71.38 | 15706 | 69.34 | 787  | 5.01  |
| <b>#24 (day 438)</b>                                                         | 2811  | 676   | 24.05 | 479   | 17.04 | 476   | 16.93 | 62   | 13.03 |
| <b>#25 (day 421)</b>                                                         | 9852  | 5166  | 52.44 | 1041  | 10.57 | 1026  | 10.41 | 314  | 30.60 |
| <b>#26 (day 419)</b>                                                         | 7602  | 5225  | 68.73 | 1192  | 15.68 | 1183  | 15.56 | 167  | 14.12 |
| <b>#27 (day 421)</b>                                                         | 6332  | 3479  | 54.94 | 1450  | 22.90 | 1432  | 22.62 | 190  | 13.27 |
| <b>#28 (day 429)</b>                                                         | 3633  | 1957  | 53.87 | 910   | 25.05 | 904   | 24.88 | 181  | 20.02 |
| <b>#29 (day 440)</b>                                                         | 7387  | 4490  | 60.78 | 3597  | 48.69 | 3546  | 48.00 | 462  | 13.03 |
| <b>#30 (day 427)</b>                                                         | 16825 | 14116 | 83.90 | 11178 | 66.44 | 10887 | 64.71 | 504  | 4.63  |
| <b>Subject (time) - serial samples between primary infection and week 60</b> |       |       |       |       |       |       |       |      |       |
| <b>#26 (day 8)</b>                                                           | 27346 | 25675 | 93.89 | 23655 | 86.50 | 23302 | 85.21 | 356  | 1.53  |
| <b>#26 (day 34)</b>                                                          | 27373 | 25676 | 93.80 | 23268 | 85.00 | 22792 | 83.26 | 422  | 1.85  |
| <b>#26 (day 63)</b>                                                          | 19527 | 18063 | 92.50 | 16629 | 85.16 | 16244 | 83.19 | 312  | 1.92  |
| <b>#26 (day 90)</b>                                                          | 18753 | 17035 | 90.84 | 7448  | 39.72 | 6450  | 34.39 | 323  | 5.01  |
| <b>#26 (day 219)</b>                                                         | 39681 | 36466 | 91.90 | 16711 | 42.11 | 14180 | 35.73 | 523  | 3.69  |
| <b>#26 (day 255)</b>                                                         | 18273 | 16948 | 92.75 | 6788  | 37.15 | 5809  | 31.79 | 330  | 5.68  |
| <b>#26 (day 318)</b>                                                         | 41616 | 35032 | 84.18 | 15544 | 37.35 | 13704 | 32.93 | 531  | 3.87  |
| <b>#26 (day 328)</b>                                                         | 22577 | 19805 | 87.72 | 8618  | 38.17 | 7555  | 33.46 | 401  | 5.31  |
| <b># 17 (day 49)</b>                                                         | 23556 | 21623 | 91.79 | 11658 | 49.49 | 11079 | 47.03 | 822  | 7.42  |
| <b># 17 (day 84)</b>                                                         | 9149  | 8262  | 90.30 | 4251  | 46.46 | 4060  | 44.38 | 411  | 10.12 |
| <b># 17 (day 119)</b>                                                        | 14202 | 12627 | 88.91 | 5716  | 40.25 | 5481  | 38.59 | 527  | 9.62  |
| <b># 17 (day 175)</b>                                                        | 12851 | 11069 | 86.13 | 4706  | 36.62 | 4513  | 35.12 | 635  | 14.07 |
| <b># 17 (day 266)</b>                                                        | 19425 | 17213 | 88.61 | 7210  | 37.12 | 6764  | 34.82 | 807  | 11.93 |
| <b># 17 (day 357)</b>                                                        | 33844 | 29222 | 86.34 | 16464 | 48.65 | 15519 | 45.85 | 1471 | 9.48  |
| <b># 25 (day 2)</b>                                                          | 2149  | 1013  | 47.14 | 412   | 19.17 | 354   | 16.47 | 112  | 31.64 |

|                        |       |       |       |       |       |       |       |      |      |
|------------------------|-------|-------|-------|-------|-------|-------|-------|------|------|
| <b># 25 (day 35)</b>   | 56360 | 30955 | 54.92 | 26035 | 46.19 | 25854 | 45.87 | 2074 | 8.02 |
| <b># 25 (day 98)</b>   | 22306 | 20125 | 90.22 | 18285 | 81.97 | 18162 | 81.42 | 724  | 3.99 |
| <b># 25 (day 175)</b>  | 58021 | 34467 | 59.40 | 29546 | 50.92 | 29323 | 50.54 | 2374 | 8.10 |
| <b># 25 (day 287)</b>  | 88144 | 31801 | 36.08 | 26822 | 30.43 | 26604 | 30.18 | 2313 | 8.69 |
| <b># 25 (day 367)</b>  | 67407 | 34082 | 50.56 | 29595 | 43.90 | 29387 | 43.60 | 2087 | 7.10 |
| <b>Mean</b>            | 13929 | 10141 | 80.22 | 7129  | 57.91 | 6908  | 56.40 | 437  | 8.42 |
| <b>Control samples</b> |       |       |       |       |       |       |       |      |      |
| <b>E6</b>              | 15908 | 11222 | 70.54 | 9826  | 61.77 | 9783  | 61.50 | 213  | 2.18 |
| <b>H8</b>              | 19215 | 18040 | 93.88 | 15602 | 81.20 | 15524 | 80.79 | 279  | 1.80 |
| <b>E6:H8</b>           | 15739 | 11763 | 74.74 | 11515 | 73.16 | 11491 | 73.01 | 297  | 2.58 |
| <b>Mean</b>            | 16954 | 13675 | 79.72 | 12314 | 72.04 | 12266 | 71.77 | 263  | 2.19 |

<sup>a</sup> Short reads and reads with low identity to reference sequence were removed. A maximum of 40000 reads was used.

<sup>b</sup> Assemblies were visually inspected and misaligned reads removed.

<sup>c</sup> Reads containing "Ns" were removed.
