# Supplementary material for: Restriction of V3 region sequence divergence in the HIV-1 envelope gene during antiretroviral treatment in a cohort of recent seroconverters
Source: PubMed Central journal article supplement (PMC3605130; doi:10.1186/1742-4690-10-8), 2013-01-18

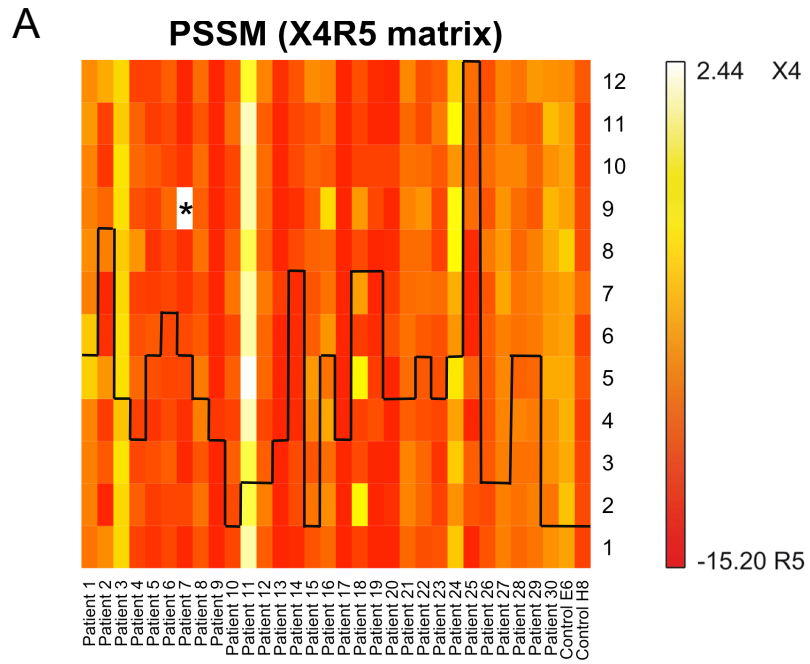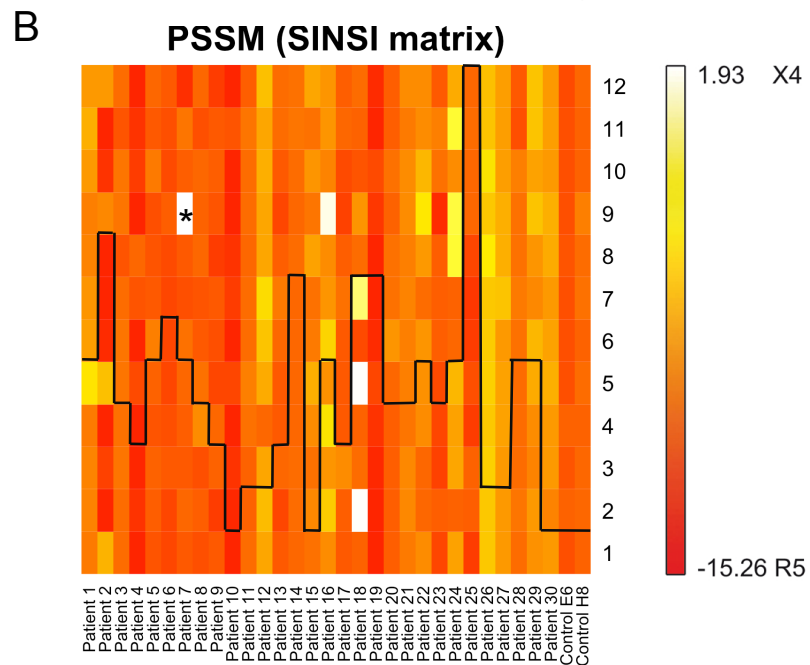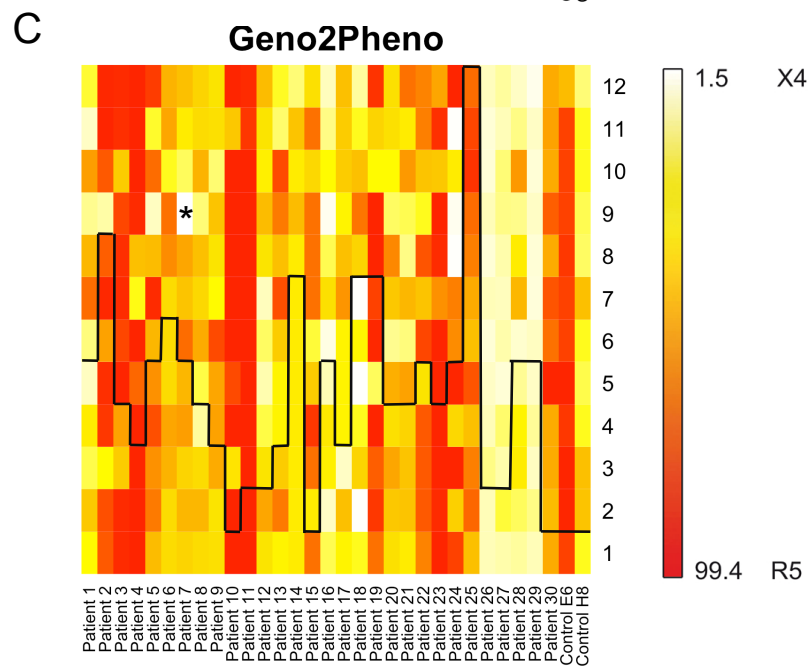

Supplement: 1742-4690-10-8-S3.pdf [file 1742-4690-10-8-S3.pdf]
