# Supplementary material for: Restriction of V3 region sequence divergence in the HIV-1 envelope gene during antiretroviral treatment in a cohort of recent seroconverters
Source: PubMed Central journal article supplement (PMC3605130; doi:10.1186/1742-4690-10-8), 2013-01-18
Supplement: 1742-4690-10-8-S6.pdf [file 1742-4690-10-8-S6.pdf]

**SFF (one file per region of a PicoTiterPlate )**

Split by MIDs (sfffile)

**SFF (one file per sample)**

Convert to FASTA (sffinfo)

**FASTA (one file per sample)**

Map against HIV-1 subtype B from UK 2005  
(FJ653428)

Remove reads < 70 nt and/or with low  
identity to the reference sequence  
(Segminator)

**Initial assembly**

Trim to env V3

Remove reads  
with Ns

Visual  
inspection

Remove  
duplicates

Remove reads  
with frequencies  
< 1.5%

**Final error-corrected assembly with unique sequences**
